# Supplementary material for: Integration with Transcriptomic and Metabolomic Analyses Reveals the In Vitro Cytotoxic Mechanisms of Chinese Poplar Propolis by Triggering the Glucose Metabolism in Human Hepatocellular Carcinoma Cells
Source: MDPI journal article supplement (doi:10.3390/nu15204329), 2023-10-11
Supplement: s1 [file s1]

**Supplemental Table S1. Sequences of the primers for qRT-PCR.**

| Genes                           | Primer sequence                                                 | Reference  |
|---------------------------------|-----------------------------------------------------------------|------------|
| <i>GLUT1</i>                    | F5'-GGCCAAGAGTGTGCTAAAGAA-3'<br>R5'-ACAGCGTTGATGCCAGACAG-3'     | [63]       |
| <i>GLUT3</i>                    | F5'-GGTGGCTGCTTTATGGGACT-3'<br>R5'-GTAAAACCCAGTAGCAGCGG-3'      | This study |
| <i>HK2</i>                      | F5'-GAGCCACCACTCACCCTACT-3'<br>R5'-CCAGGCATTCGGCAATGTG-3'       | [63]       |
| <i>PFK</i>                      | F5'-AGGAGGGGAAGGGCATCT-3'<br>R5'-TTCCTATCAAATGGGGTTGG-3'        | [64]       |
| <i>PKM2</i>                     | F5'-ATGTCGAAGCCCCATAGTGAA-3'<br>R5'-TGGGTGGTGAATCAATGTCCA-3'    | [63]       |
| <i>LDHA</i>                     | F5'-ATGGCAACTCTAAAGGATCAGC-3'<br>R5'-CCAACCCCAACAACCTGTAATCT-3' | [63]       |
| <i><math>\beta</math>-actin</i> | F5'-AGTTGCGTTACACCCTTTCTTG-3'<br>R5'-TCACCTTCACCGTTCCAGTTT-3'   | [65]       |

**Supplemental Table S2. TOP 100 components in ethanol extract of propolis by HPLC-QTOF-MC.**

| Compound Name      | Retention Time | Ion Species |
|--------------------|----------------|-------------|
| Mollugin           | 12.091         | (M-H)-      |
| Phenethyl caffeate | 12.091         | (M-H)-      |
| Iso-sativan        | 12.091         | (M-H)-      |
| Homopterocarpin    | 12.091         | (M-H)-      |
| Glypallichalcone   | 12.091         | (M-H)-      |
| Batatasin I        | 12.091         | (M-H)-      |
| Cinnamyl benzoate  | 12.091         | (M+HCOO)-   |
| Benzyl cinnamate   | 12.091         | (M+HCOO)-   |
| Prenyl caffeate    | 11.558         | (M-H)-      |
| Tremetone          | 11.558         | (M+HCOO)-   |
| Azaleatin          | 9.094          | (M-H)-      |
| Nodifloretin       | 9.094          | (M-H)-      |
| Rhamnetin          | 9.094          | (M-H)-      |
| Pedalitin          | 9.094          | (M-H)-      |
| Isorhamnetin       | 9.094          | (M-H)-      |
| Eupafolin          | 9.094          | (M-H)-      |
| Capillarisin       | 9.094          | (M-H)-      |
| Emodin             | 9.094          | (M+HCOO)-   |
| Aloeemodin         | 9.094          | (M+HCOO)-   |
| Apigenin           | 9.094          | (M+HCOO)-   |
| Baicalein          | 9.094          | (M+HCOO)-   |
| Galangin           | 9.094          | (M+HCOO)-   |
| Genistein          | 9.094          | (M+HCOO)-   |
| 6-Hydroxyrubiadin  | 9.094          | (M+HCOO)-   |
| Thunberginol A     | 9.094          | (M+HCOO)-   |
| Sulfuretin         | 9.094          | (M+HCOO)-   |
| Rubilactone        | 9.094          | (M+HCOO)-   |
| Norwogonin         | 9.094          | (M+HCOO)-   |
| Morindon           | 9.094          | (M+HCOO)-   |
| Aurantio-obtusin   | 11.208         | (M-H)-      |
| Ombuin             | 11.208         | (M-H)-      |
| Jaceosidin         | 11.208         | (M-H)-      |
| Tricin             | 11.208         | (M-H)-      |
| Rhamnazin          | 11.208         | (M-H)-      |
| Cirsiliol          | 11.208         | (M-H)-      |
| Glycitein          | 11.208         | (M+HCOO)-   |
| Genkwanin          | 11.208         | (M+HCOO)-   |
| Izalpinin          | 11.208         | (M+HCOO)-   |
| Physcion           | 11.208         | (M+HCOO)-   |
| Calycosin          | 11.208         | (M+HCOO)-   |
| Oroxylin           | 11.208         | (M+HCOO)-   |

| Compound Name                                                                                  | Retention Time | Ion Species |
|------------------------------------------------------------------------------------------------|----------------|-------------|
| Galangin 3-methyl ether                                                                        | 11.208         | (M+HCOO)-   |
| Damnacanthol                                                                                   | 11.208         | (M+HCOO)-   |
| Cypripedin                                                                                     | 11.208         | (M+HCOO)-   |
| Biochanin A                                                                                    | 11.208         | (M+HCOO)-   |
| Acacetin                                                                                       | 11.208         | (M+HCOO)-   |
| Xenognosin B                                                                                   | 11.208         | (M+HCOO)-   |
| Wogonin                                                                                        | 11.208         | (M+HCOO)-   |
| Stevein                                                                                        | 11.208         | (M+HCOO)-   |
| Questin                                                                                        | 11.208         | (M+HCOO)-   |
| Prunetin                                                                                       | 11.208         | (M+HCOO)-   |
| Obtusifolin                                                                                    | 11.208         | (M+HCOO)-   |
| Alpinone                                                                                       | 9.044          | (M-H)-      |
| Pabulenol                                                                                      | 9.044          | (M-H)-      |
| Brasilin                                                                                       | 9.044          | (M-H)-      |
| Heraclenin                                                                                     | 9.044          | (M-H)-      |
| Isogosferol                                                                                    | 9.044          | (M-H)-      |
| Isooxypeucedanin                                                                               | 9.044          | (M-H)-      |
| Kushenin                                                                                       | 9.044          | (M-H)-      |
| Moracin B                                                                                      | 9.044          | (M-H)-      |
| Oxypeucedanin                                                                                  | 9.044          | (M-H)-      |
| Phyllodulcin                                                                                   | 9.044          | (M-H)-      |
| Quinquangulin                                                                                  | 9.044          | (M-H)-      |
| Sakuranetin                                                                                    | 9.044          | (M-H)-      |
| Vestitone                                                                                      | 9.044          | (M-H)-      |
| 5,7,4'-Trihydroxy-8-methylflavanone                                                            | 9.044          | (M-H)-      |
| Thespone                                                                                       | 9.044          | (M+HCOO)-   |
| Chrysarobin                                                                                    | 9.044          | (M+HCOO)-   |
| Flavidin                                                                                       | 9.044          | (M+HCOO)-   |
| Moscatin                                                                                       | 9.044          | (M+HCOO)-   |
| (Z,E)-2-(3,5-Dihydroxyphenyl) ethenyl<br>ester of 3-(3,4-dihydroxyphenyl)-2-<br>propenoic acid | 12.157         | (M-H)-      |
| 1,7-Dihydroxy-3,9-dimethoxy<br>pterocarpene                                                    | 12.157         | (M-H)-      |
| (-)-3-Hydroxy-4-methoxy-8-9-<br>methylenedioxy pterocarpan                                     | 12.157         | (M-H)-      |
| Kumatakenin                                                                                    | 12.157         | (M-H)-      |
| 7-Methoxy-aromadendrin                                                                         | 12.157         | (M-H)-      |
| Pectolinarigenin                                                                               | 12.157         | (M-H)-      |
| Panicolin                                                                                      | 12.157         | (M-H)-      |
| Persicogenin                                                                                   | 12.157         | (M-H)-      |
| Pisatin                                                                                        | 12.157         | (M-H)-      |
| Rhynchotechol                                                                                  | 12.157         | (M-H)-      |

| Compound Name                                                                                  | Retention Time | Ion Species |
|------------------------------------------------------------------------------------------------|----------------|-------------|
| trans-3-Acetoxy-5,7-dihydroxyflavanone                                                         | 12.157         | (M-H)-      |
| Cirsimaritin                                                                                   | 12.157         | (M-H)-      |
| 5,8-Dihydroxy-6,7-dimethoxyflavone                                                             | 12.157         | (M-H)-      |
| 2',7-Dihydroxy-4',5'-dimethoxyisoflavone                                                       | 12.157         | (M-H)-      |
| (Z,E)-2-(3,4-Dihydroxyphenyl) ethenyl<br>ester of 3-(3,4-dihydroxyphenyl)-2-<br>propenoic acid | 12.157         | (M-H)-      |
| Tectochrysin                                                                                   | 12.157         | (M+HCOO)-   |
| Dalbergin                                                                                      | 12.157         | (M+HCOO)-   |
| Formononetin                                                                                   | 12.157         | (M+HCOO)-   |
| Isodalbergin                                                                                   | 12.157         | (M+HCOO)-   |
| 7-Methoxy-4'-hydroxyflavone                                                                    | 12.157         | (M+HCOO)-   |
| Pallidiflorin                                                                                  | 12.157         | (M+HCOO)-   |
| Pratol                                                                                         | 12.157         | (M+HCOO)-   |
| Rubiadin-1-methyl ether                                                                        | 12.157         | (M+HCOO)-   |
| Medicarpin                                                                                     | 11.658         | (M-H)-      |
| Echinatin                                                                                      | 11.658         | (M-H)-      |
| Vignafuran                                                                                     | 11.658         | (M-H)-      |
| Isoimperatorin                                                                                 | 11.658         | (M-H)-      |
| Imperatorin                                                                                    | 11.658         | (M-H)-      |
| Cardamonin                                                                                     | 11.658         | (M-H)-      |

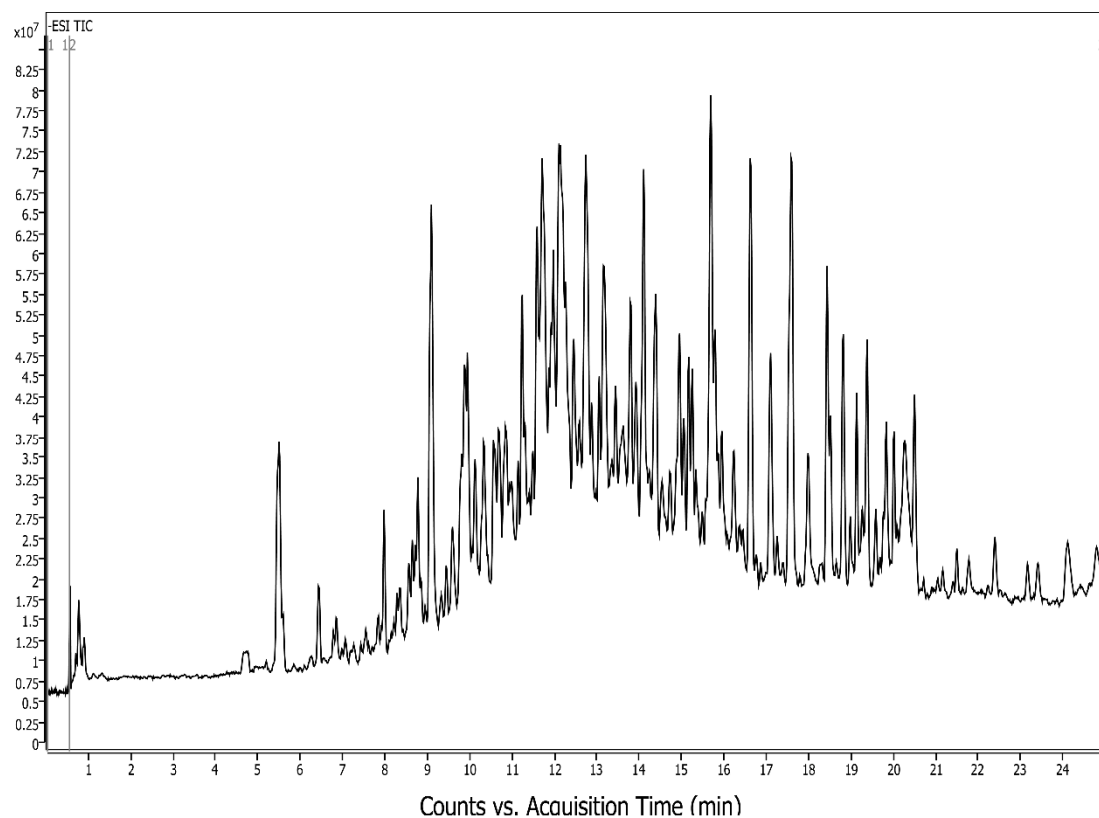

**Figure S1. Total ion current chromatogram (TIC) of the propolis extracts from the negative mode analyzed by UHPLC/Q-TOF-MS.**
